# Supplementary material for: Partially Hydrolyzed Guar Gum Suppresses the Development of Sarcopenic Obesity
Source: MDPI journal article supplement (doi:10.3390/nu14061157), 2022-03-09
Supplement: s1 [file s1]

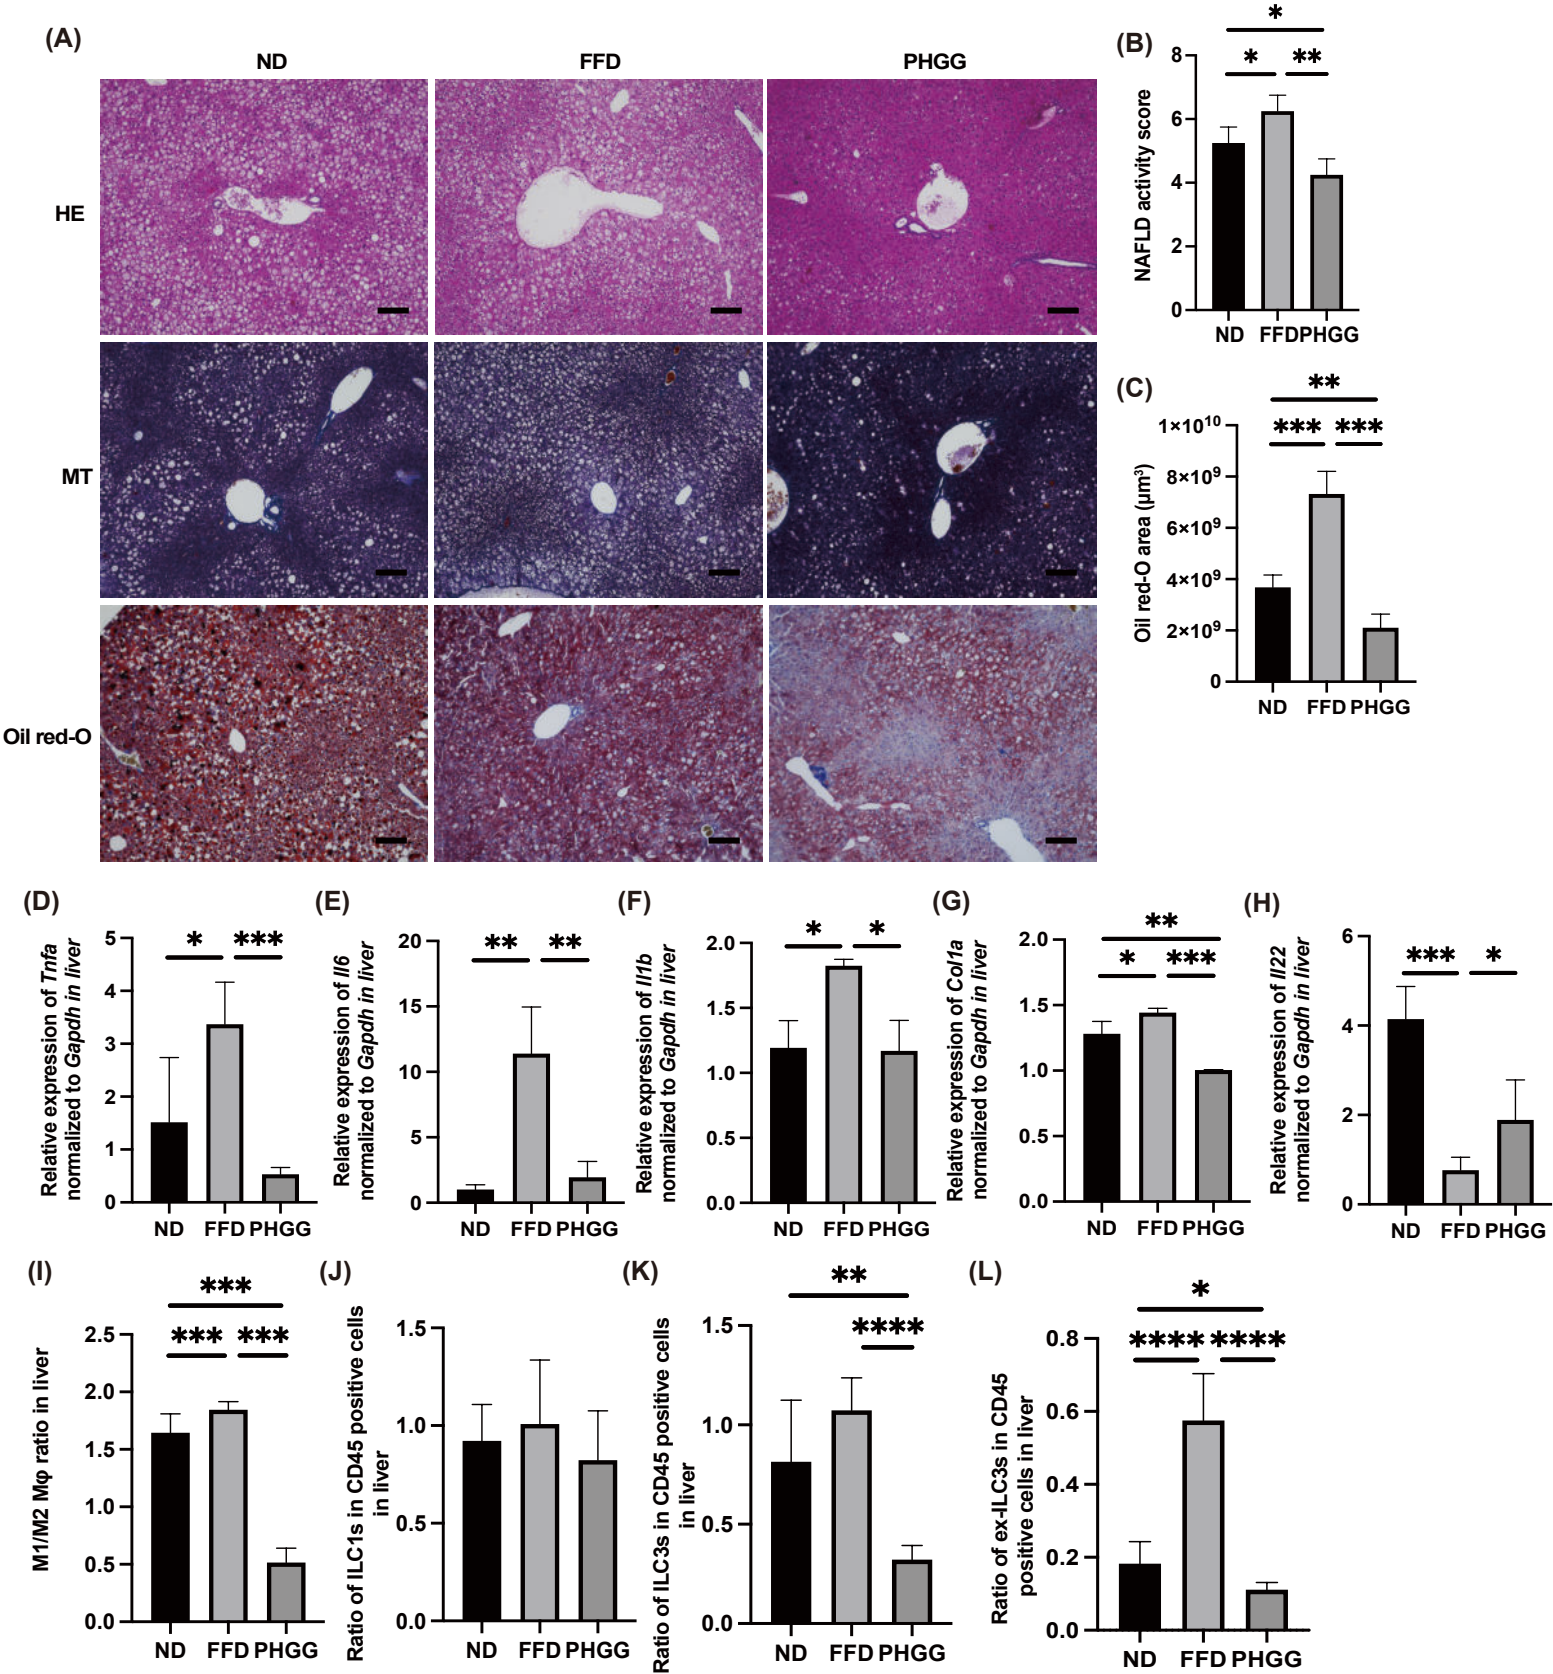

Figure 2

**Supplementary Figure S1. Administration of PHGG improved fatty liver and decreased the expression of genes related to inflammation, liver fibrosis, and fatty acid metabolism, and decreased the ratio of M1 macrophages, ILC1, ILC3, and ex-ILC3.**

(A) Representative images of hematoxylin & eosin-, Masson trichrome-, and oil red-O- stained liver sections. Liver tissues were collected at 16-weeks of age. The scale bar shows 100  $\mu$ m.

(B) Nonalcoholic fatty liver disease (NAFLD) activity scores ( $n = 6$ ). (C) Oil red-O-stained area ( $n = 6$ ).

Relative mRNA expression of (D) Tnfa, (E) Il6, (F) Il1b, (G) Col1a, and (H) Il22 in the liver normalized to the expression of Gapdh ( $n = 6$ ). Ratio of (I) M1 to M2 macrophages, (J) ILC1s to CD45-positive cells, (K) ILC3s to CD45-positive cells, and (L) ex-ILC3s to CD45-positive cells in the liver ( $n = 6$  in each case).

Data are represented as the mean  $\pm$  SD values. \* $p < 0.05$ , \*\* $p < 0.01$ , \*\*\* $p < 0.001$ , \*\*\*\*  $p < 0.0001$ , as determined by one-way ANOVA.

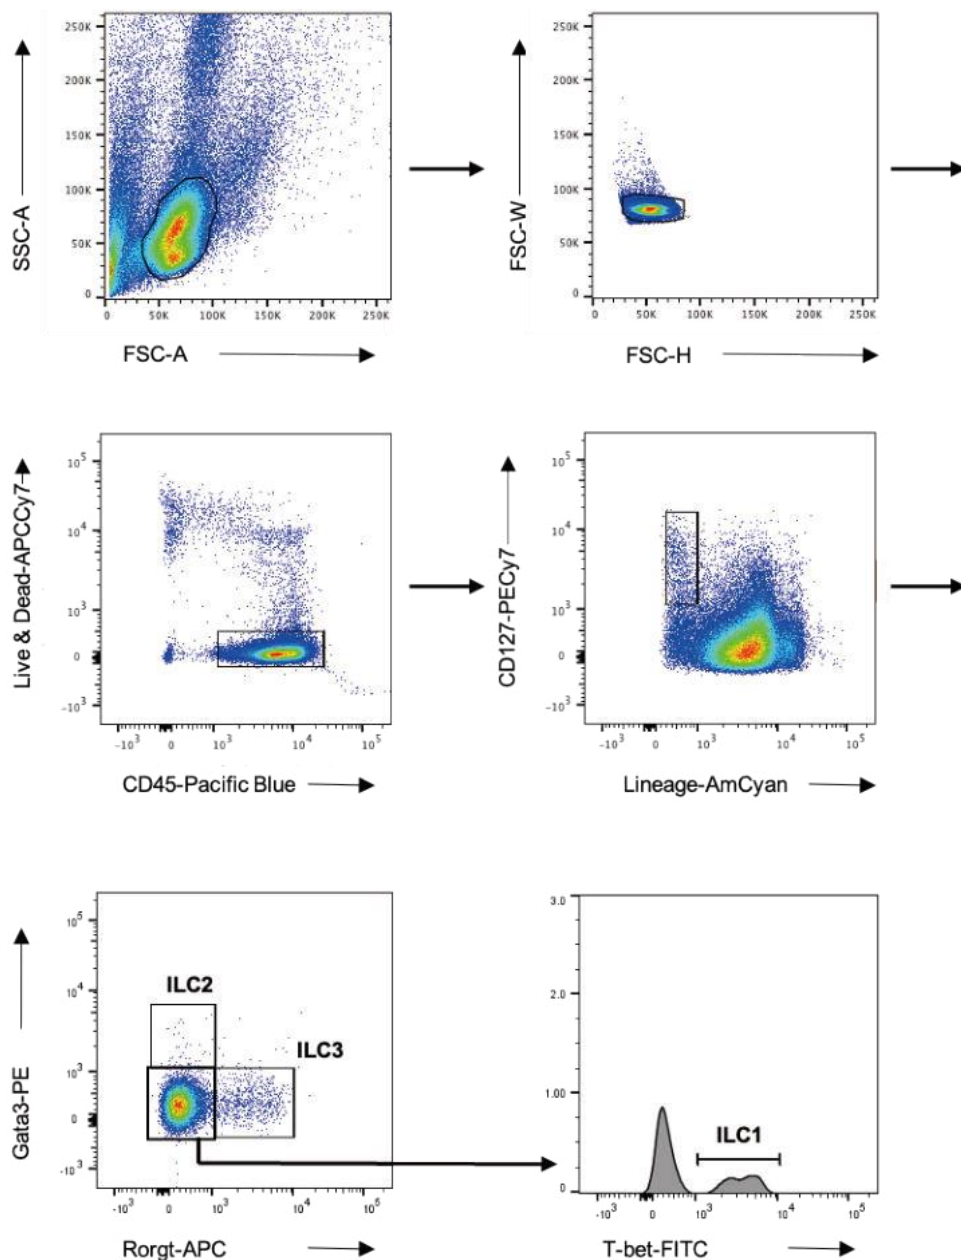

### Supplementary Figure S2. Strategy for innate lymphoid cells (ILCs)

Representative flow cytometry plots of liver CD45+ Live & Dead- Lin- CD127+ RORγ- GATA-3- T-bet+ ILC1s, CD45+ Live & Dead- Lin- CD127+ RORγ- GATA-3+ ILC2s and CD45+ Live & Dead- Lin- CD127+ RORγ+ GATA-3- ILC3s in each group at 16-weeks of age.

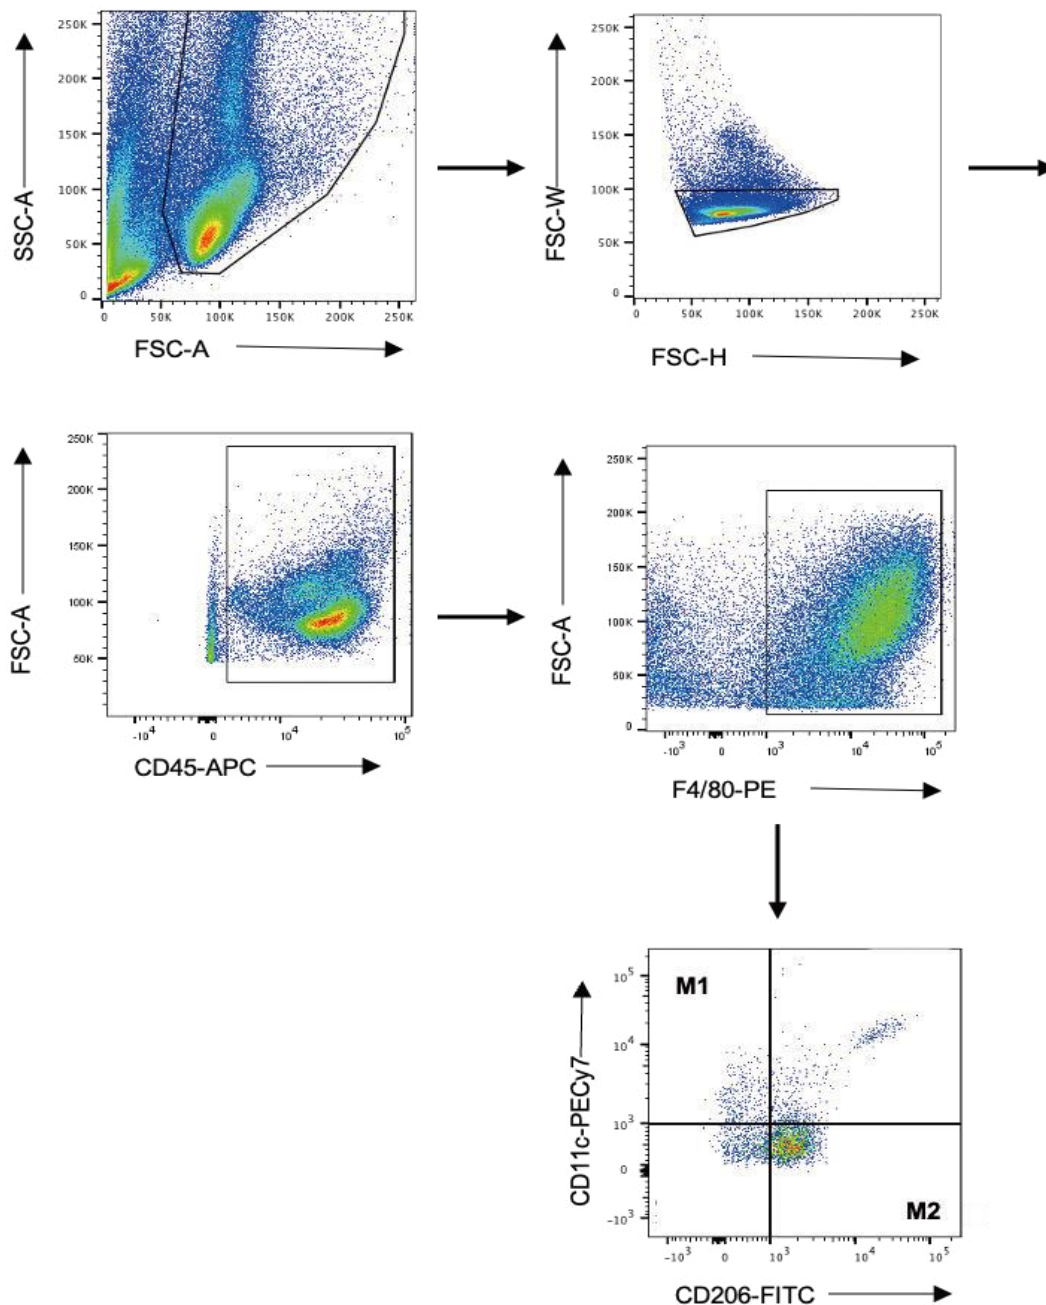

### Supplementary Figure S3. Strategy for macrophages

Representative flow cytometry plots of liver CD45+ F4/80+ CD206- CD11c+ M1 macrophages and CD45+ F4/80+ CD206+ CD11c- M2 macrophages in each group at 16 weeks of age.

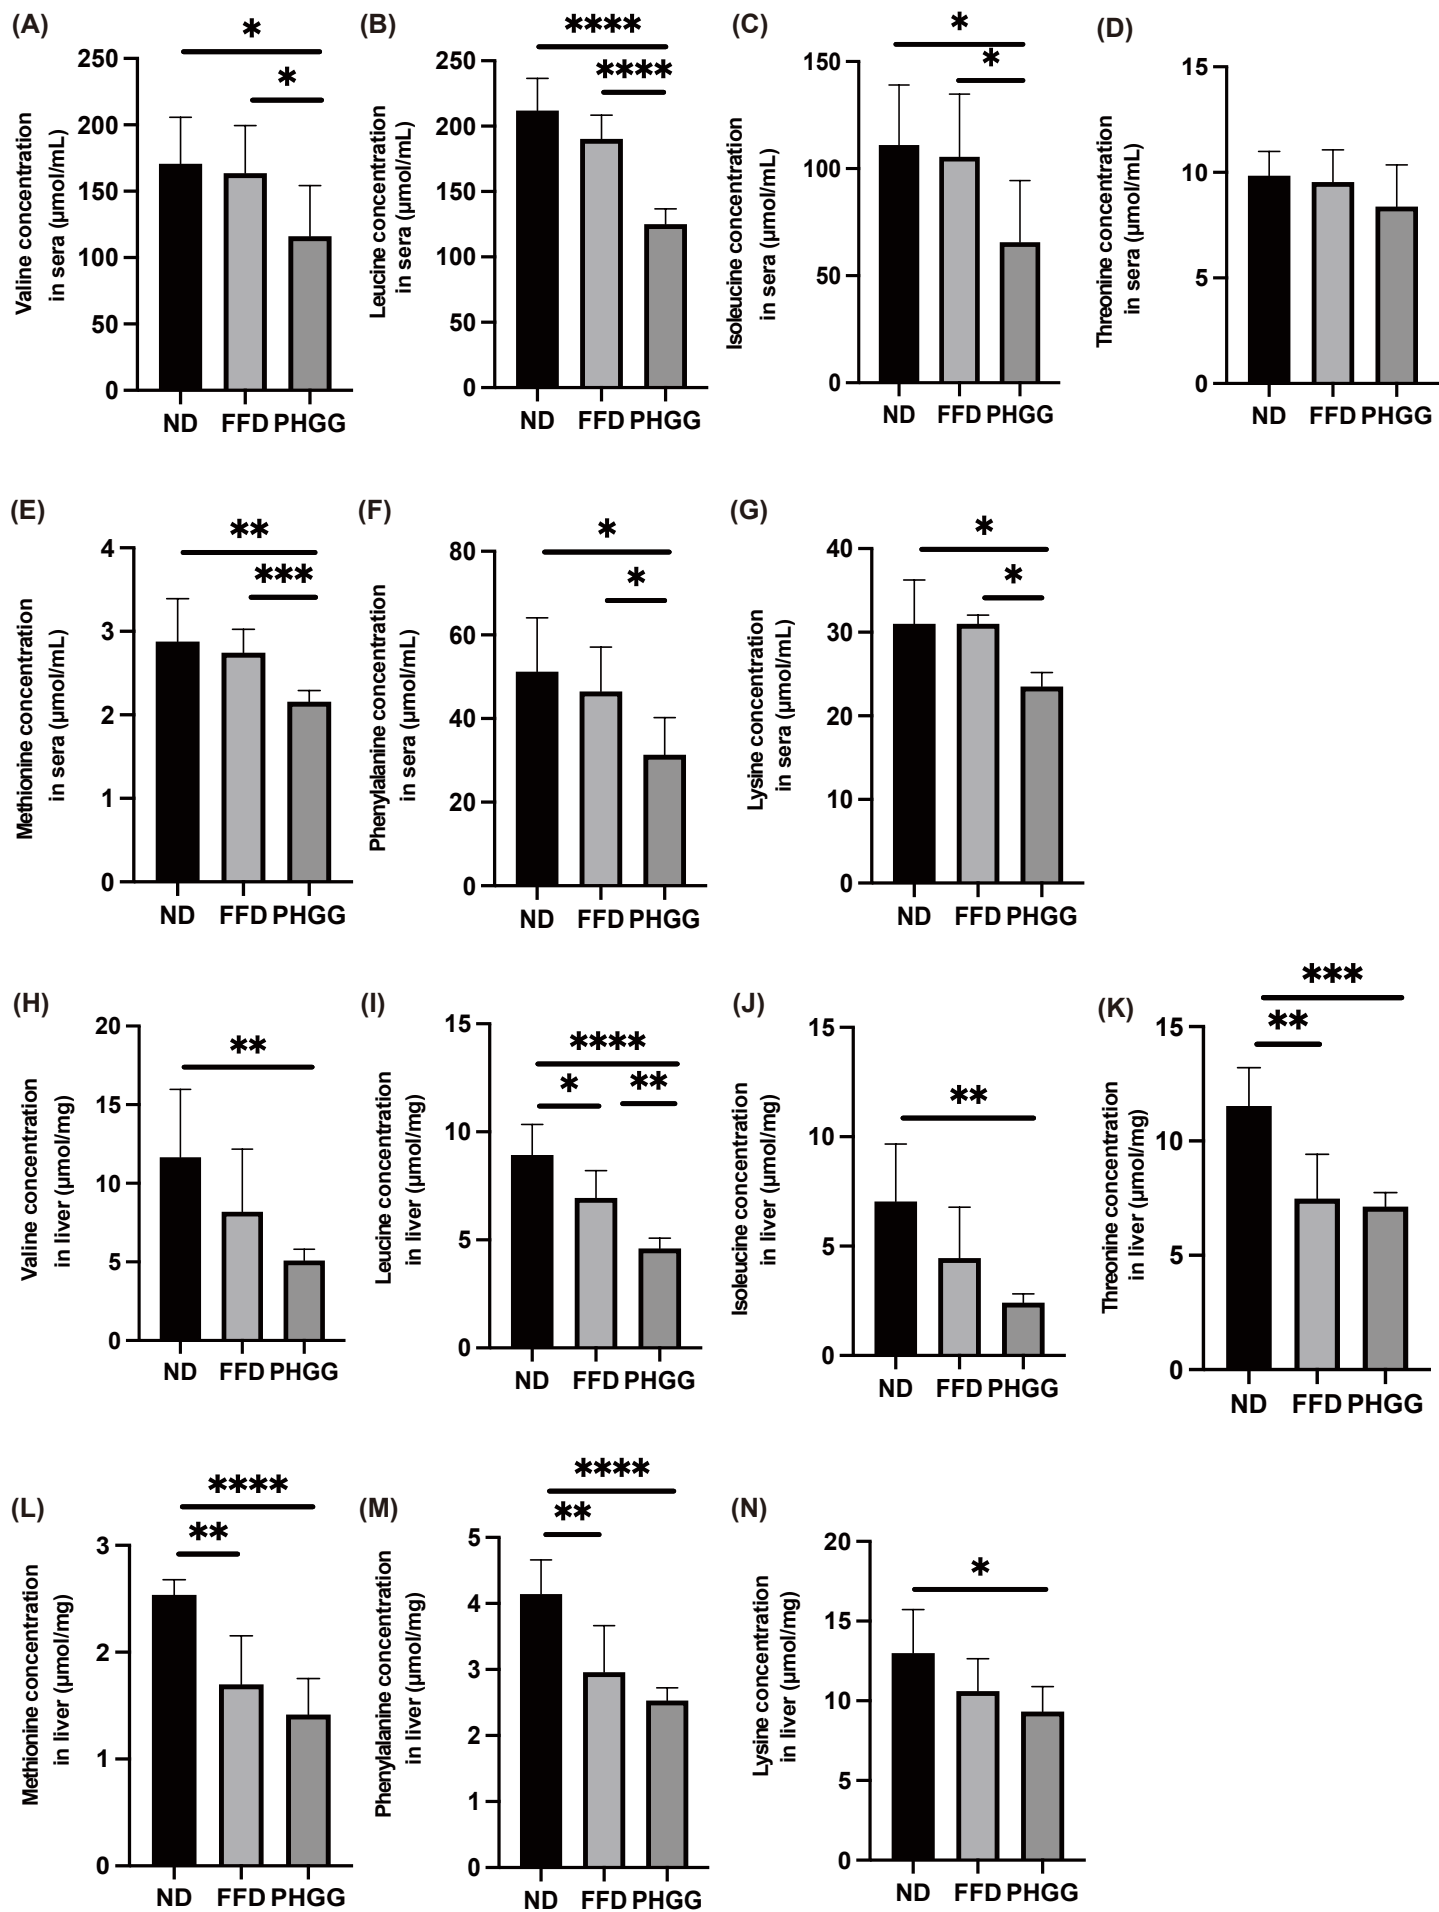

**Supplementary Figure S4. The administration of PHGG decreased the concentration of the amino acids related to muscle biosynthesis.**

The concentrations of (A) valine, (B) leucine, (C) isoleucine, (D) threonine, (E) methionine, (F) phenylalanine, and (G) lysine in the sera ( $n = 6$ ). The concentrations of (H) valine, (I) leucine, (J) isoleucine, (K) threonine, (L) methionine, (M) phenylalanine, and (N) lysine in the liver ( $n = 6$ ).

Data are represented as the mean  $\pm$  SD values; \* $p < 0.05$ , \*\* $p < 0.01$ , \*\*\* $p < 0.001$ , \*\*\*\* $p < 0.0001$ , as determined by one-way ANOVA.



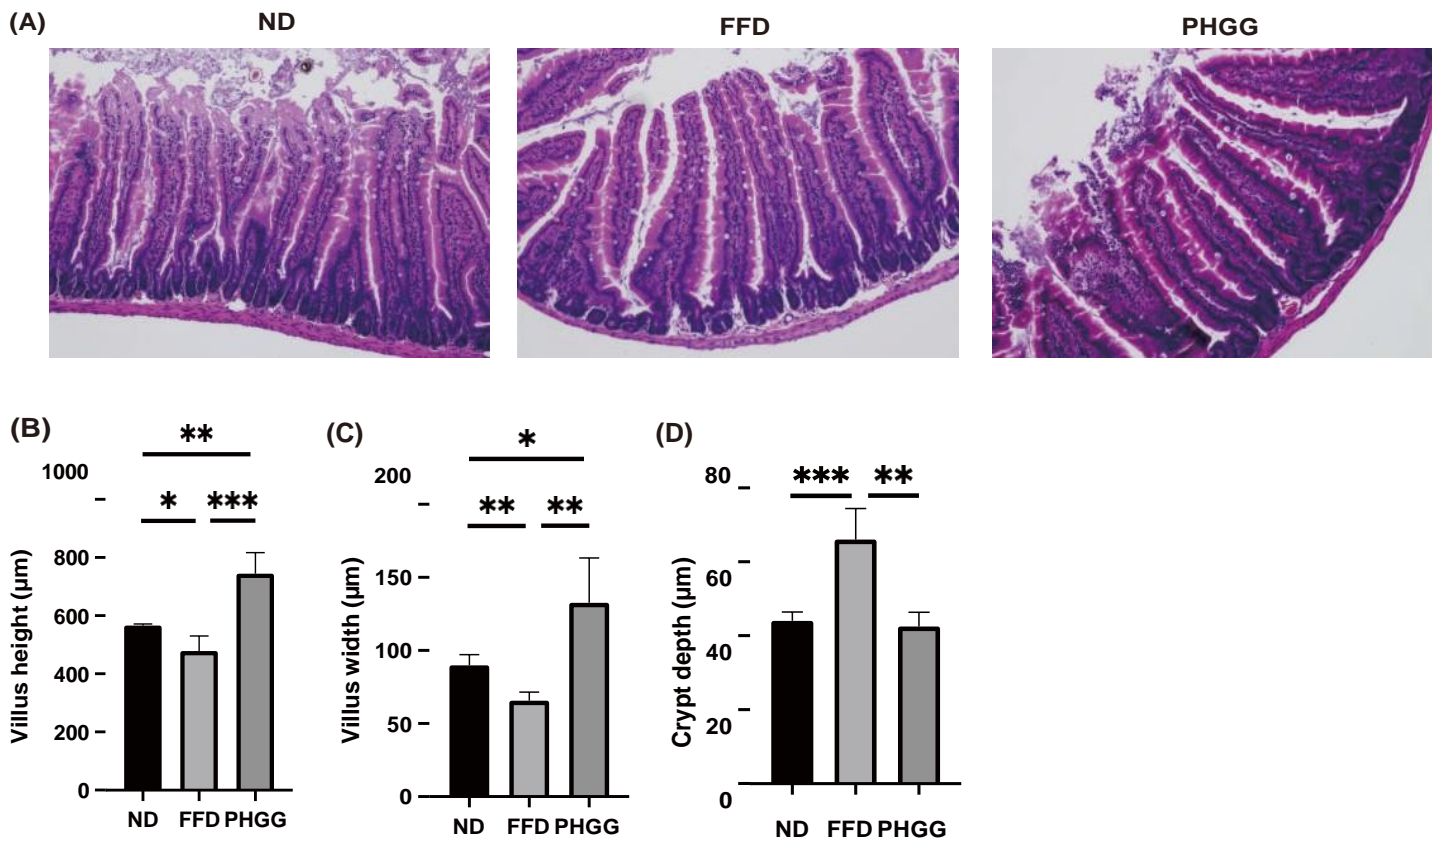

### Supplementary Figure S5. Administration of PHGG reduced small intestinal inflammation.

(A) Representative images showing the histological features of the jejunum of the mice.

(B) Villus height of the jejunum ( $n = 6$ ). (C) Villus width of the jejunum ( $n = 6$ ). (D) Crypt depth of the jejunum ( $n = 6$ ).

Scale bar: 100 $\mu\text{m}$ .

Data have been represented in terms of mean  $\pm$  SD values. \* $p < 0.05$ , \*\* $p < 0.01$ , and \*\*\* $p < 0.001$  using a paired t-test.
